# Supplementary material
Source: MDPI journal article supplement (https://www.mdpi.com/2075-163X/12/11/1380)
Supplement: s1 [file s1]

## Supplementary Materials

# A Combined Extended X-ray Absorption Fine Structure Spectroscopy and Density Functional Theory Study of Americium vs. Yttrium Adsorption on Corundum ( $\alpha$ -Al<sub>2</sub>O<sub>3</sub>)

Nina Huittinen <sup>1,\*</sup>, Sinikka Virtanen <sup>2</sup>, André Rossberg <sup>1,3</sup>, Manuel Eibl <sup>1</sup>, Satu Lönnrot <sup>2</sup> and Robert Polly <sup>4</sup>

<sup>1</sup> Helmholtz-Zentrum Dresden-Rossendorf, Institute of Resource Ecology, Bautzner Landstraße 400, 01328 Dresden, Germany

<sup>2</sup> Department of Chemistry, Radiochemistry Unit, University of Helsinki, A. I. Virtasen aukio 1, P.O. Box 55, 00014 Helsinki, Finland

<sup>3</sup> The Rossendorf Beamline, The European Synchrotron Radiation Facility, P.O. Box 40220, 38043 Grenoble, France

<sup>4</sup> Institute for Nuclear Waste Disposal, Karlsruhe Institute of Technology, P.O. Box 3640, 76021 Karlsruhe, Germany

\* Correspondence: n.huittinen@hzdr.de; Tel.: +49-351-260-2148

**Table S1.** Sample description and results obtained from **A)** isotherm experiment 1, containing Eu<sup>3+</sup> only, **B)** isotherm experiment 2, containing varying concentrations of Eu<sup>3+</sup> and a constant Y<sup>3+</sup> concentration of 10<sup>-6</sup> mol/L and **C)** isotherm experiment 3, containing varying concentrations of Eu<sup>3+</sup> and a constant Y<sup>3+</sup> concentration of 10<sup>-4</sup> mol/L. Buffered samples containing 0.01 mol/L TRIS buffer (tris(hydroxymethyl) aminomethane) in 0.01 mol/L NaClO<sub>4</sub> were used to avoid pH fluctuations. A constant concentration of 1.3×10<sup>-9</sup> mol/L radioactive <sup>152</sup>Eu was added to all samples, and the overall Eu<sup>3+</sup> concentration was adjusted with of a commercial 1,000 ppm Eu<sup>3+</sup> standard solution in 0.5 mol/L HNO<sub>3</sub>. In the isotherms with Y<sup>3+</sup> as competing metal, Y<sup>3+</sup> was added to the samples from a commercial 1,000 ppm Y<sup>3+</sup> standard in 0.5 mol/L HNO<sub>3</sub>. The addition of the trivalent metal cations was done simultaneously to the corundum containing suspensions. Sample pH adjustment was carried out over several days to avoid precipitation of Eu:Y(OH)<sub>3</sub> from oversaturated solutions. After an equilibrium time of one week, the solution was separated from the solid phase via centrifugation. The <sup>152</sup>Eu concentration was measured with liquid scintillation counting. The precision of the pH-measurements is ± 0.1.

| A) Isotherm experiment 1 |                  |                                       |                                      |                                                     |                               |                                    |                                      |
|--------------------------|------------------|---------------------------------------|--------------------------------------|-----------------------------------------------------|-------------------------------|------------------------------------|--------------------------------------|
| Sample No.               | pH <sub>eq</sub> | c(Eu <sup>3+</sup> ), initial (mol/L) | c(Y <sup>3+</sup> ), initial (mol/L) | c( $\alpha$ -Al <sub>2</sub> O <sub>3</sub> ) (g/L) | Eu <sup>3+</sup> adsorbed (%) | Eu <sup>3+</sup> adsorbed (mol/kg) | Eu <sup>3+</sup> in solution (mol/L) |
| 1                        | 8.27             | 1.30×10 <sup>-9</sup>                 |                                      |                                                     | 99.97                         | 2.60×10 <sup>-6</sup>              | 4.17×10 <sup>-13</sup>               |
| 2                        | 8.24             | 6.30×10 <sup>-9</sup>                 |                                      |                                                     | 99.96                         | 1.26×10 <sup>-5</sup>              | 2.85×10 <sup>-12</sup>               |
| 3                        | 8.23             | 8.80×10 <sup>-9</sup>                 |                                      |                                                     | 99.96                         | 1.76×10 <sup>-5</sup>              | 3.66×10 <sup>-12</sup>               |
| 4                        | 8.25             | 1.13×10 <sup>-8</sup>                 |                                      |                                                     | 99.96                         | 2.26×10 <sup>-5</sup>              | 4.70×10 <sup>-12</sup>               |
| 5                        | 8.25             | 2.63×10 <sup>-8</sup>                 |                                      |                                                     | 99.99                         | 5.26×10 <sup>-5</sup>              | 2.78×10 <sup>-12</sup>               |
| 6                        | 8.25             | 7.63×10 <sup>-8</sup>                 |                                      |                                                     | 99.95                         | 1.53×10 <sup>-4</sup>              | 4.18×10 <sup>-11</sup>               |
| 7                        | 8.16             | 7.51×10 <sup>-7</sup>                 |                                      |                                                     | 99.98                         | 1.50×10 <sup>-3</sup>              | 1.33×10 <sup>-10</sup>               |
| 8                        | 8.22             | 1.00×10 <sup>-6</sup>                 | 0                                    | 0.5                                                 | 99.96                         | 2.00×10 <sup>-3</sup>              | 4.53×10 <sup>-10</sup>               |
| 9                        | 8.24             | 2.50E×10 <sup>-6</sup>                |                                      |                                                     | 99.95                         | 5.00×10 <sup>-3</sup>              | 1.19×10 <sup>-9</sup>                |
| 10                       | 8.25             | 5.00×10 <sup>-6</sup>                 |                                      |                                                     | 99.98                         | 1.00×10 <sup>-2</sup>              | 8.27×10 <sup>-10</sup>               |
| 11                       | 8.25             | 7.50×10 <sup>-6</sup>                 |                                      |                                                     | 99.79                         | 1.50×10 <sup>-2</sup>              | 1.57×10 <sup>-9</sup>                |
| 12                       | 8.25             | 1.00×10 <sup>-5</sup>                 |                                      |                                                     | 99.35                         | 1.99×10 <sup>-2</sup>              | 6.52×10 <sup>-8</sup>                |
| 13                       | 8.24             | 2.50×10 <sup>-5</sup>                 |                                      |                                                     | 97.83                         | 4.89×10 <sup>-2</sup>              | 5.42×10 <sup>-7</sup>                |
| 14                       | 8.25             | 5.00×10 <sup>-5</sup>                 |                                      |                                                     | 93.87                         | 9.39×10 <sup>-2</sup>              | 3.07×10 <sup>-6</sup>                |
| 15                       | 8.27             | 7.50×10 <sup>-5</sup>                 |                                      |                                                     | 87.71                         | 1.32×10 <sup>-2</sup>              | 9.22×10 <sup>-6</sup>                |

|    |      |                       |  |  |       |                       |                       |
|----|------|-----------------------|--|--|-------|-----------------------|-----------------------|
| 16 | 8.27 | 1.00×10 <sup>-4</sup> |  |  | 89.67 | 1.79×10 <sup>-2</sup> | 1.03×10 <sup>-5</sup> |
|----|------|-----------------------|--|--|-------|-----------------------|-----------------------|

  

| B) Isotherm experiment 2 |                  |                                       |                                      |                                            |                               |                                    |                                      |
|--------------------------|------------------|---------------------------------------|--------------------------------------|--------------------------------------------|-------------------------------|------------------------------------|--------------------------------------|
| Sample No.               | pH <sub>eq</sub> | c(Eu <sup>3+</sup> ), initial (mol/L) | c(Y <sup>3+</sup> ), initial (mol/L) | c(α-Al <sub>2</sub> O <sub>3</sub> ) (g/L) | Eu <sup>3+</sup> adsorbed (%) | Eu <sup>3+</sup> adsorbed (mol/kg) | Eu <sup>3+</sup> in solution (mol/L) |
| 1                        | 8.33             | 1.3×10 <sup>-9</sup>                  |                                      |                                            | 99.06                         | 2.58×10 <sup>-6</sup>              | 1.22×10 <sup>-11</sup>               |
| 2                        | 8.34             | 6.30×10 <sup>-9</sup>                 |                                      |                                            | 99.08                         | 1.25×10 <sup>-5</sup>              | 5.77×10 <sup>-11</sup>               |
| 3                        | 8.35             | 8.80×10 <sup>-9</sup>                 |                                      |                                            | 99.01                         | 1.74×10 <sup>-5</sup>              | 8.70×10 <sup>-11</sup>               |
| 4                        | 8.35             | 1.13×10 <sup>-8</sup>                 |                                      |                                            | 99.06                         | 2.24×10 <sup>-5</sup>              | 1.06×10 <sup>-10</sup>               |
| 5                        | 8.35             | 2.63×10 <sup>-8</sup>                 |                                      |                                            | 99.12                         | 5.21×10 <sup>-5</sup>              | 2.31×10 <sup>-10</sup>               |
| 6                        | 8.36             | 5.13×10 <sup>-8</sup>                 |                                      |                                            | 99.15                         | 1.02×10 <sup>-4</sup>              | 4.37×10 <sup>-10</sup>               |
| 7                        | 8.36             | 7.63×10 <sup>-8</sup>                 |                                      |                                            | 99.21                         | 1.51×10 <sup>-4</sup>              | 6.06×10 <sup>-10</sup>               |
| 8                        | 8.35             | 1.01×10 <sup>-7</sup>                 |                                      |                                            | 98.89                         | 2.00×10 <sup>-4</sup>              | 1.12×10 <sup>-9</sup>                |
| 9                        | 8.35             | 2.51×10 <sup>-7</sup>                 |                                      |                                            | 96.42                         | 4.85×10 <sup>-4</sup>              | 9.01×10 <sup>-9</sup>                |
| 10                       | 8.36             | 5.01×10 <sup>-7</sup>                 | 10 <sup>-6</sup>                     | 0.5                                        | 99.00                         | 9.93×10 <sup>-4</sup>              | 5.03×10 <sup>-9</sup>                |
| 11                       | 8.33             | 7.51×10 <sup>-7</sup>                 |                                      |                                            | 99.21                         | 1.49×10 <sup>-3</sup>              | 5.97×10 <sup>-9</sup>                |
| 12                       | 8.33             | 1.00×10 <sup>-6</sup>                 |                                      |                                            | 98.76                         | 1.98×10 <sup>-3</sup>              | 1.25×10 <sup>-9</sup>                |
| 13                       | 8.33             | 2.50×10 <sup>-6</sup>                 |                                      |                                            | 98.87                         | 4.95×10 <sup>-3</sup>              | 2.82×10 <sup>-8</sup>                |
| 14                       | 8.35             | 5.00×10 <sup>-6</sup>                 |                                      |                                            | 98.17                         | 9.82×10 <sup>-3</sup>              | 9.16×10 <sup>-8</sup>                |
| 15                       | 8.36             | 7.50×10 <sup>-6</sup>                 |                                      |                                            | 97.61                         | 1.46×10 <sup>-2</sup>              | 1.79×10 <sup>-7</sup>                |
| 16                       | 8.34             | 1.00×10 <sup>-5</sup>                 |                                      |                                            | 96.57                         | 1.93×10 <sup>-2</sup>              | 3.43×10 <sup>-7</sup>                |
| 17                       | 8.34             | 2.50×10 <sup>-5</sup>                 |                                      |                                            | 95.38                         | 4.77×10 <sup>-2</sup>              | 1.16×10 <sup>-6</sup>                |
| 18                       | 8.34             | 5.00×10 <sup>-5</sup>                 |                                      |                                            | 93.88                         | 9.39×10 <sup>-2</sup>              | 3.06×10 <sup>-6</sup>                |

  

| C) Isotherm experiment 3 |                  |                                       |                                      |                                            |                               |                                    |                                      |
|--------------------------|------------------|---------------------------------------|--------------------------------------|--------------------------------------------|-------------------------------|------------------------------------|--------------------------------------|
| Sample No.               | pH <sub>eq</sub> | c(Eu <sup>3+</sup> ), initial (mol/L) | c(Y <sup>3+</sup> ), initial (mol/L) | c(α-Al <sub>2</sub> O <sub>3</sub> ) (g/L) | Eu <sup>3+</sup> adsorbed (%) | Eu <sup>3+</sup> adsorbed (mol/kg) | Eu <sup>3+</sup> in solution (mol/L) |
| 1                        | 8.31             | 1.3×10 <sup>-9</sup>                  |                                      |                                            | 89.78                         | 2.33×10 <sup>-6</sup>              | 1.33×10 <sup>-10</sup>               |
| 2                        | 8.31             | 6.30×10 <sup>-9</sup>                 |                                      |                                            | 90.56                         | 1.14×10 <sup>-5</sup>              | 5.95×10 <sup>-10</sup>               |
| 3                        | 8.26             | 8.80×10 <sup>-9</sup>                 |                                      |                                            | 86.84                         | 1.53×10 <sup>-5</sup>              | 1.16×10 <sup>-9</sup>                |
| 4                        | 8.28             | 1.13×10 <sup>-8</sup>                 |                                      |                                            | 87.94                         | 1.99×10 <sup>-5</sup>              | 1.36×10 <sup>-9</sup>                |
| 5                        | 8.26             | 2.63×10 <sup>-8</sup>                 |                                      |                                            | 90.11                         | 4.74×10 <sup>-5</sup>              | 2.60×10 <sup>-9</sup>                |
| 6                        | 8.25             | 5.13×10 <sup>-8</sup>                 |                                      |                                            | 74.53                         | 7.65×10 <sup>-5</sup>              | 1.31×10 <sup>-8</sup>                |
| 7                        | 8.25             | 7.63×10 <sup>-8</sup>                 |                                      |                                            | 88.02                         | 1.34×10 <sup>-4</sup>              | 9.14×10 <sup>-9</sup>                |
| 8                        | 8.26             | 1.01×10 <sup>-7</sup>                 | 10 <sup>-4</sup>                     | 0.5                                        | 89.21                         | 1.81×10 <sup>-4</sup>              | 1.09×10 <sup>-8</sup>                |
| 9                        | 8.23             | 2.51×10 <sup>-7</sup>                 |                                      |                                            | 87.02                         | 4.37×10 <sup>-4</sup>              | 3.26×10 <sup>-8</sup>                |
| 10                       | 8.25             | 5.01×10 <sup>-7</sup>                 |                                      |                                            | 88.24                         | 8.85×10 <sup>-4</sup>              | 5.90×10 <sup>-8</sup>                |
| 11                       | 8.19             | 7.51×10 <sup>-7</sup>                 |                                      |                                            | 88.07                         | 1.32×10 <sup>-3</sup>              | 8.96×10 <sup>-8</sup>                |
| 12                       | 8.24             | 1.00×10 <sup>-6</sup>                 |                                      |                                            | 88.33                         | 1.77×10 <sup>-3</sup>              | 1.17×10 <sup>-7</sup>                |
| 13                       | 8.22             | 2.50×10 <sup>-6</sup>                 |                                      |                                            | 87.75                         | 4.39×10 <sup>-3</sup>              | 3.07×10 <sup>-7</sup>                |
| 14                       | 8.23             | 5.00×10 <sup>-6</sup>                 |                                      |                                            | 82.06                         | 8.21×10 <sup>-3</sup>              | 8.97×10 <sup>-7</sup>                |
| 15                       | 8.26             | 7.50×10 <sup>-6</sup>                 |                                      |                                            | 77.24                         | 1.16×10 <sup>-2</sup>              | 1.71×10 <sup>-6</sup>                |

|    |      |                       |  |       |                       |                       |
|----|------|-----------------------|--|-------|-----------------------|-----------------------|
| 16 | 8.26 | $1.00 \times 10^{-5}$ |  | 79.98 | $1.60 \times 10^{-2}$ | $2.00 \times 10^{-6}$ |
| 17 | 8.27 | $2.50 \times 10^{-5}$ |  | 77.58 | $3.88 \times 10^{-2}$ | $5.61 \times 10^{-6}$ |

**Table S2.** Summary of EXAFS sample parameters. The background electrolyte in the experiments was 0.01 mol/L NaClO<sub>4</sub>. The <sup>243</sup>Am stock solution concentration was 5.96 ×10<sup>-2</sup> mol/L in 1 mol/L HCl. Yttrium was applied from a 0.2 mol/L Y<sup>3+</sup> stock solution prepared by dissolving YCl<sub>3</sub>×6H<sub>2</sub>O in 0.01 mol/L HClO<sub>4</sub>. Sample pH adjustment was carried out over several days to avoid precipitation of Am:Y(OH)<sub>3</sub> from oversaturated solutions. An equilibrium time of two days after the last pH adjustment was used before phase separation. The <sup>243</sup>Am concentration was measured with  $\gamma$ -counting. The precision of the pH-measurements is  $\pm$  0.1.

| Sample | pH <sub>eq</sub> | c(Am <sup>3+</sup> ), initial<br>(mol/L) | c(Y <sup>3+</sup> ), initial<br>(mol/L) | c( $\alpha$ -Al <sub>2</sub> O <sub>3</sub> )<br>(g/L) | Am <sup>3+</sup> adsorbed<br>(%) | Am <sup>3+</sup> adsorbed<br>(mol/kg) | Am <sup>3+</sup> in solution<br>(mol/L) |
|--------|------------------|------------------------------------------|-----------------------------------------|--------------------------------------------------------|----------------------------------|---------------------------------------|-----------------------------------------|
| 1      | 8.41             | 6×10 <sup>-6</sup>                       | 0                                       | 2                                                      | 99.99                            | 3.00×10 <sup>-3</sup>                 | 6.00×10 <sup>-10</sup>                  |
| 2      | 8.46             | 2×10 <sup>-5</sup>                       | 0                                       | 2                                                      | 99.98                            | 1.00×10 <sup>-2</sup>                 | 4.00×10 <sup>-9</sup>                   |
| 3      | 8.47             | 6×10 <sup>-6</sup>                       | 2×10 <sup>-5</sup>                      | 2                                                      | 99.60                            | 2.99×10 <sup>-3</sup>                 | 2.40×10 <sup>-8</sup>                   |
| 4      | 8.48             | 2×10 <sup>-5</sup>                       | 2×10 <sup>-5</sup>                      | 2                                                      | 99.34                            | 9.93×10 <sup>-3</sup>                 | 1.32×10 <sup>-7</sup>                   |
| 5      | 8.50             | 2×10 <sup>-5</sup>                       | 2×10 <sup>-4</sup>                      | 2                                                      | 96.91                            | 9.73×10 <sup>-3</sup>                 | 5.34×10 <sup>-7</sup>                   |
